# Supplementary material for: Synthesis of glycerol carbonate using Li/Mg/K modified zeolite beta: a kinetic study
Source: Royal Society of Chemistry journal article supplement (doi:10.1039/d3nj05074b), 2024-01-01
Supplement: d3nj05074b1.pdf [file d3nj05074b1.pdf]

## Supporting Information

### Synthesis of Glycerol Carbonate using Lithium-modified Zeolite Beta: A Kinetic Study

Priyanka Gautam<sup>1</sup>, Sanghamitra Barman<sup>\*,2</sup>, Amjad Ali<sup>1,3</sup>

<sup>1</sup> *School of Chemistry and Biochemistry, Thapar Institute of Engineering and Technology,  
Patiala-147004, India*

<sup>2</sup> *Department of Chemical Engineering, Thapar Institute of Engineering and Technology,  
Patiala-147004, India*

<sup>3</sup> *TIET-VT Center of Excellence for Emerging Materials, Thapar Institute of Engineering and  
Technology, Patiala-147004, India*

*\*Corresponding E-mail: sbarman@thapar.edu (S. Barman)*

<https://orcid.org/0000-0002-9189-5035>

**Table of contents:**

**Table S1** Comparison with previously reported zeolites.

**Fig. S1** Diagrammatic representation of Li-modified zeolite beta.

**Fig. S2**  $^1\text{H}$  NMR spectrum of the reaction mixture

**Fig. S3**  $^{13}\text{C}$  NMR spectrum of the reaction mixture

**Fig. S4** FT-IR comparison of the reaction mixture with pure GC and GLY

**Fig. S5** HRMS data of the reaction mixture

**Fig. S6** A plot of (a)  $1-X_{\text{GC}}$ , (b)  $-\ln(1-X_{\text{GC}})$ , and  $1/1-X_{\text{GC}}$  *versus* reaction time for zero, first, and second-order reactions.

**Table S1** Comparison with previously reported zeolites.

| <b>Sr. No.</b> | <b>Catalyst / amount</b>  | <b>Mole ratio (GLY:DM C)</b> | <b>Temperature (°C)</b> | <b>Detection method of product</b> | <b>% Yield</b> | <b>Selectivity of GC (%)</b> | <b>Catalyst reusability</b> | <b>Reaction kinetics</b>       |
|----------------|---------------------------|------------------------------|-------------------------|------------------------------------|----------------|------------------------------|-----------------------------|--------------------------------|
| 1.             | Na-Y/ 10 wt%              | 1:3                          | 70                      | GC                                 | 80             | 99                           | 5                           | -                              |
| 2.             | K- Zeolite/ 4wt%          | 1:3                          | 75                      | GC                                 | 96             | 100                          | 4                           | -                              |
| 3.             | Li <sub>20</sub> β/ 10wt% | 1:5                          | 95                      | <sup>1</sup> H NMR                 | 81.48          | 100                          | 5                           | 2 <sup>nd</sup> order kinetics |

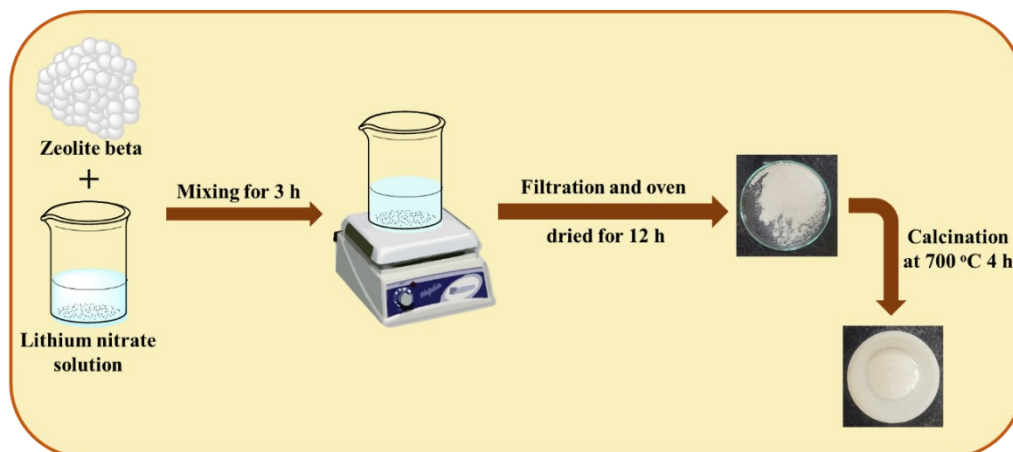

**Fig. S1** Diagrammatic representation of Li-modified zeolite beta.

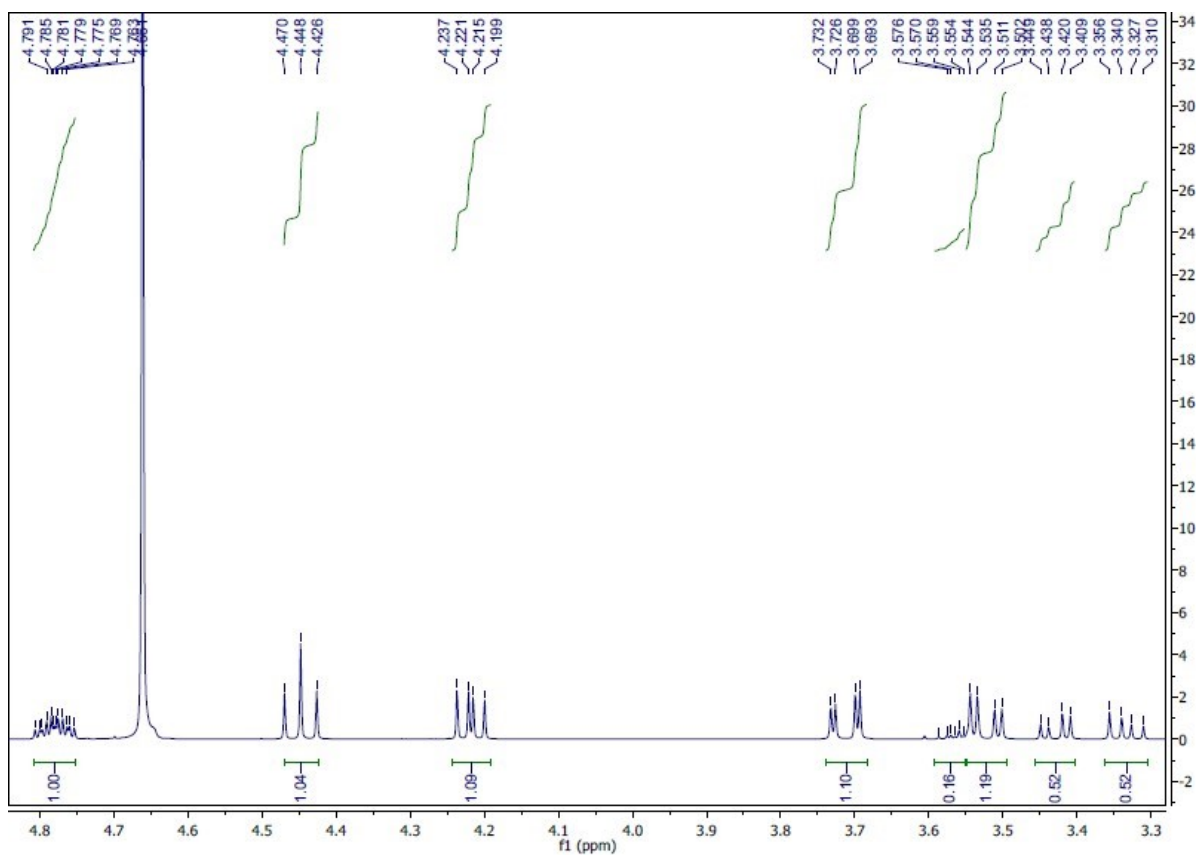

**Fig. S2**  $^1\text{H}$  NMR spectrum of the reaction mixture.

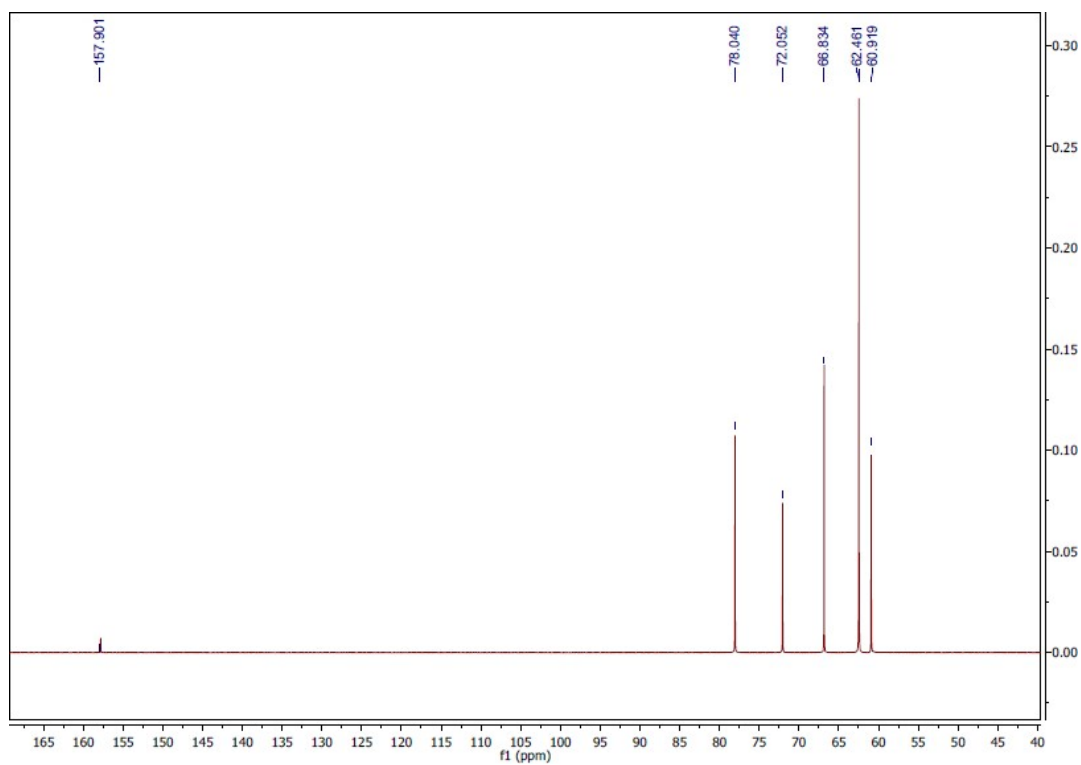

**Fig. S3**  $^{13}\text{C}$  NMR spectrum of the reaction mixture.

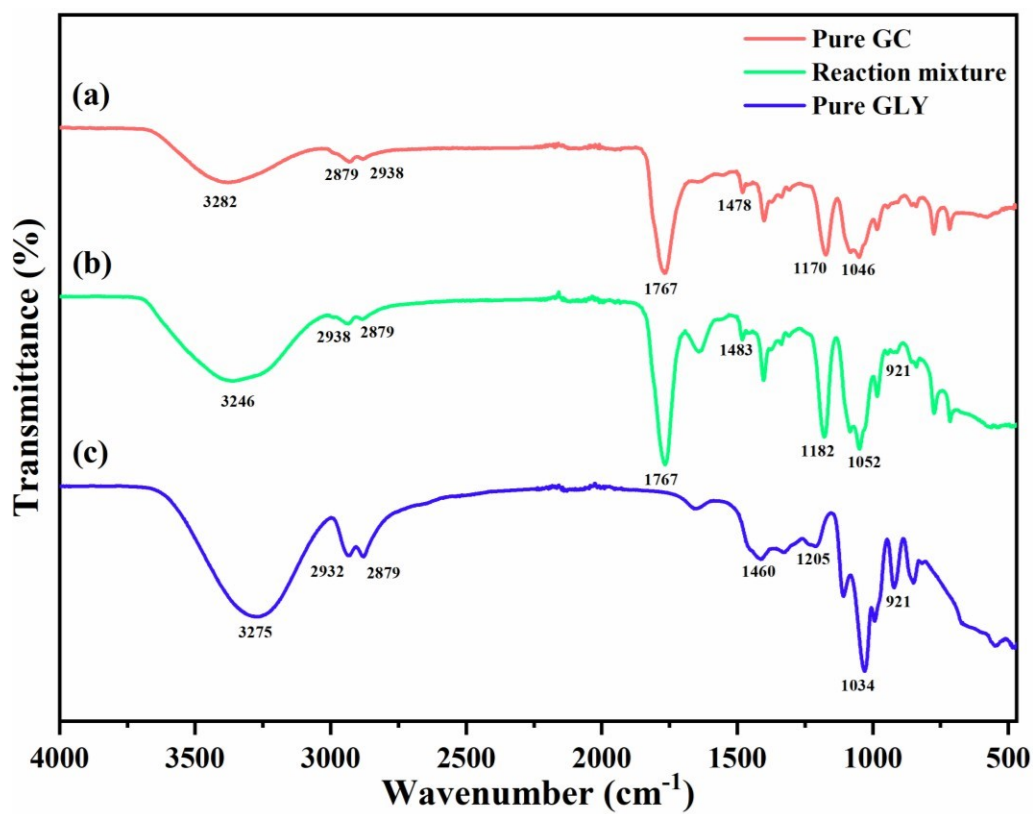

**Fig. S4** FT-IR comparison of the reaction mixture with pure GC and GLY.

## HRMS data

In the HRMS spectra of the final product, a signal at  $m/z$  118.0502 corresponds to the mass of glycerol carbonate (118.0498). While the base peak observed at  $m/z$  100.0639 corresponds to the fragment formed after the loss of water molecule from glycerol carbonate. A peak observed at  $m/z$  95.8186 relates to the mass of tri-protonated glycerol ( $92.0938 + 3H^+$ ), indicating the presence of glycerol in the reaction mixture. Another peak observed at  $m/z$  75.897 indicates the removal of water molecules from the GLY during the mass analysis.

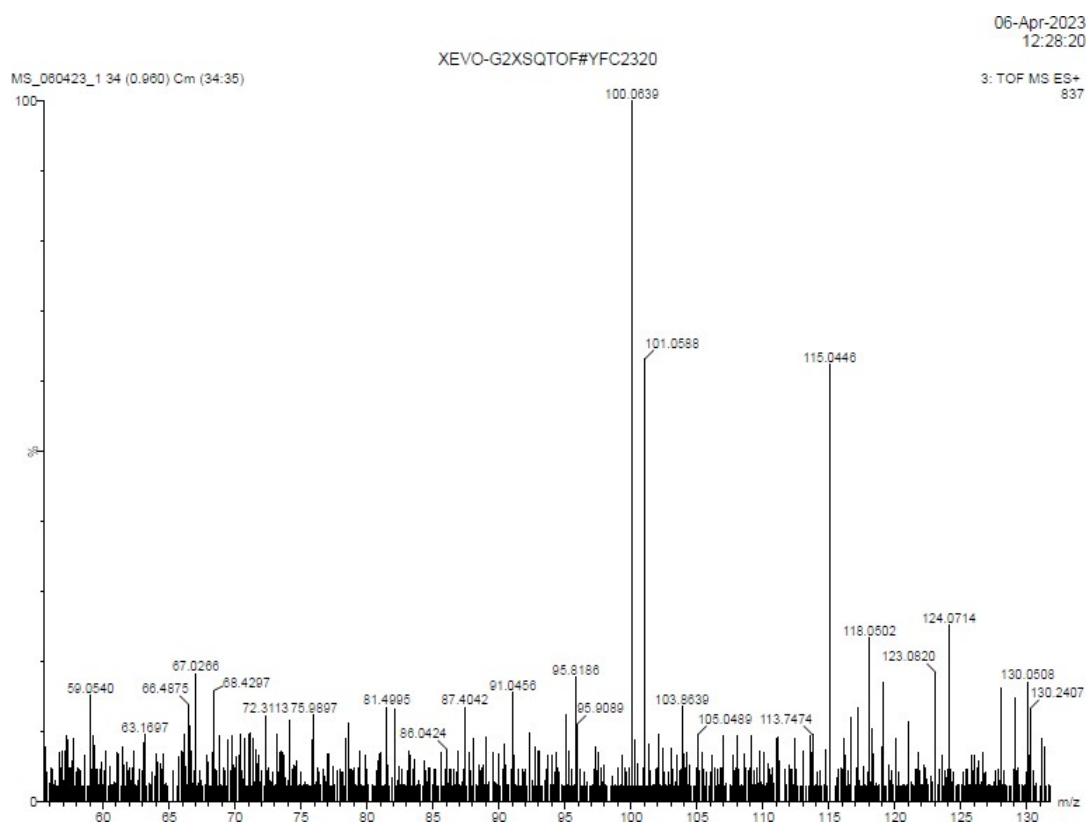

**Fig. S5** HRMS of left-out glycerol and glycerol carbonate.



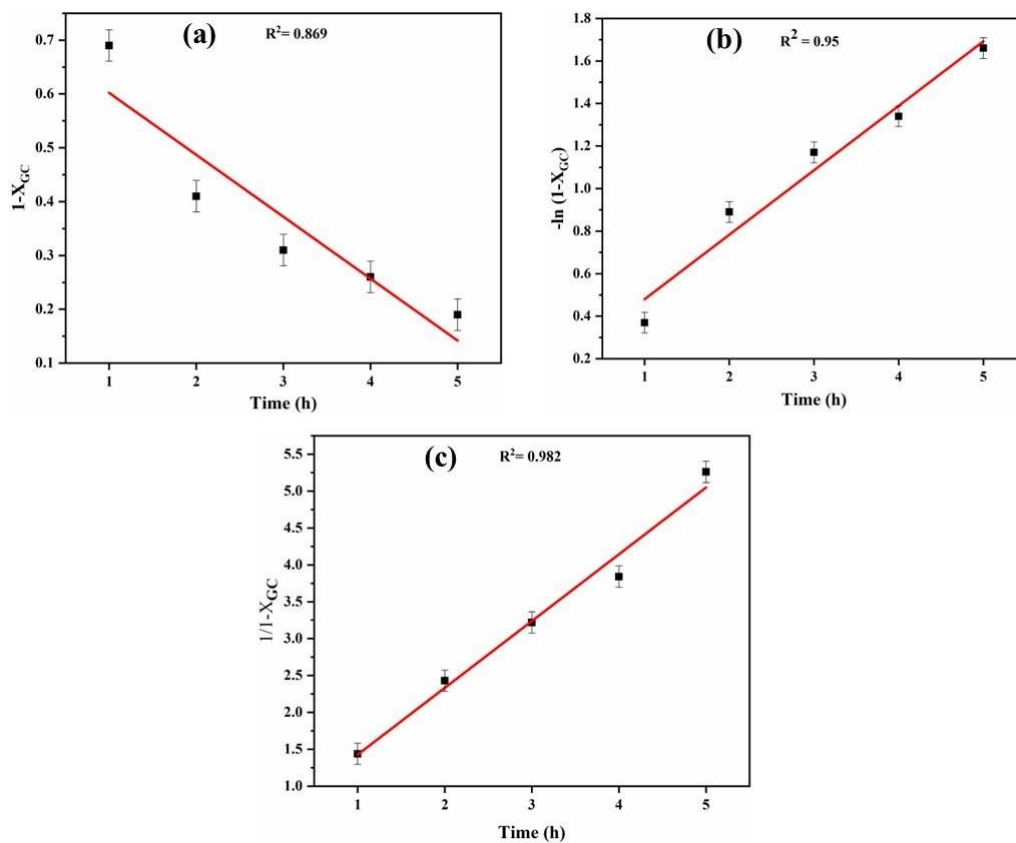

**Fig. S6** A plot of (a)  $1-X_{GC}$ , (b)  $-\ln(1-X_{GC})$ , and  $1/1-X_{GC}$  versus reaction time for zero, first, and second-order reaction (Reaction conditions: GLY:DMC mole ratio 1:5,  $Li_{20}\beta$  dosage 10 wt% w.r.t. GLY, temperature 95 °C, time 5 h)
